# Supplementary material
Source: publisher site journal article supplement (https://static.cambridge.org/content/id/urn:cambridge.org:id:article:S095834402200009X/resource/name/S095834402200009Xsupp001.docx)
Supplement: Supplementary file 1 [file S095834402200009Xsupp001.docx]

**Appendix**

Portfolio questions in relation to critical digital literacy

Critical digital literacy: This includes the ability to interact, communicate, and collaborate critically through digital technologies while being aware of cultural diversity.

Read through the points below and **give examples for as many as you can**. **Make sure you have given examples for all three points by the end of the three tasks**.

1. Give an example from your virtual exchange that illustrates how you have established a connection with others during the exchange and (if it applies) dealt with a challenging situation in your interactions with others.
2. Give an example from your virtual exchange that illustrates how you have helped another participant to establish their presence and/or find their voice.
3. Give one example that illustrates that you *have critically engaged with computer-mediated communication* during the exchange. That is, you have considered
4. the different ways the channels of communication used during the exchange (audio, text, videoconferencing, etc.) allow you to interact with others
5. the different ways these channels prevent you from interacting with others
6. the impact of this on how you perceive others.

As you write, please follow these steps: Describe + Reflect + (Re-)evaluate: What, if anything, would you do differently next time?

[CC BY SA](https://creativecommons.org/licenses/by-sa/2.0/) This document was adapted from the EVOLVE project student e-portfolio and is to be used in accordance with the Creative Commons licence applied.

The EVOLVE project student e-portfolio can be accessed here: <https://evolve-erasmus.eu/download/student-portfolio-pdf/>
